# Supplementary material for: Parallel evolution of opsin visual pigments in hawkmoths by tuning of spectral sensitivities during transition from a nocturnal to a diurnal ecology
Source: Oxford University Press journal article supplement (doi:10.1242/jeb.244541), 2022-11-21
Supplement: jeb244541supp.pdf [file jeb244541supp.pdf]

Table S1. Hawkmoth sample information surveyed by RNA-seq

| Sample ID | Species                                                      | Subfamily      | Sampling location                               | Sampling date | Sampling method  | Collector | Sex    | Ecology   | Tissues            | Fixation date & time   | No. of reads | Experiment accession no. | Run accession no. |
|-----------|--------------------------------------------------------------|----------------|-------------------------------------------------|---------------|------------------|-----------|--------|-----------|--------------------|------------------------|--------------|--------------------------|-------------------|
| Mga1      | <i>Marumba gaschkewitschii</i> echepron (Boisduval, 1875)    | Smerinthinae   | Yokosuka, Kanagawa, Japan (35°15'N, 139°37'E)   | 28/07/2014    | Adult collection | T.A.      | Male   | Nocturnal | Adult eyes & brain | 31/07/2014 12:00-13:00 | 27,175,728   | DRX229139                | DRR239257         |
| Mga2      | <i>Marumba gaschkewitschii</i> echepron (Boisduval, 1875)    | Smerinthinae   | Yokosuka, Kanagawa, Japan (35°15'N, 139°37'E)   | 28/07/2014    | Adult collection | T.A.      | Male   | Nocturnal | Adult eyes & brain | 01/08/2014 12:00-13:00 | 31,977,640   | DRX229140                | DRR239258         |
| Mga3      | <i>Marumba gaschkewitschii</i> echepron (Boisduval, 1875)    | Smerinthinae   | Yokosuka, Kanagawa, Japan (35°15'N, 139°37'E)   | 28/07/2014    | Adult collection | T.A.      | Male   | Nocturnal | Adult eyes & brain | 01/08/2014 12:00-13:00 | 30,222,302   | DRX229141                | DRR239259         |
| Aoc1      | <i>Ambulyx ochracea</i> Butler, 1885                         | Smerinthinae   | Yokosuka, Kanagawa, Japan (35°15'N, 139°37'E)   | 21/07/2014    | Adult collection | T.A.      | Male   | Nocturnal | Adult eyes & brain | 24/07/2014 12:00-13:00 | 33,952,208   | DRX229142                | DRR239260         |
| Aoc2      | <i>Ambulyx ochracea</i> Butler, 1885                         | Smerinthinae   | Yokosuka, Kanagawa, Japan (35°15'N, 139°37'E)   | 24/07/2014    | Adult collection | T.A.      | Male   | Nocturnal | Adult eyes & brain | 29/07/2014 12:00-13:00 | 28,472,930   | DRX229143                | DRR239261         |
| Aoc3      | <i>Ambulyx ochracea</i> Butler, 1885                         | Smerinthinae   | Yokosuka, Kanagawa, Japan (35°15'N, 139°37'E)   | 28/07/2014    | Adult collection | T.A.      | Male   | Nocturnal | Adult eyes & brain | 31/07/2014 12:00-13:00 | 28,297,454   | DRX229144                | DRR239262         |
| Chy1      | <i>Cephonodes hylas hylas</i> (Linnaeus, 1771)               | Macroglossinae | Higashikurume, Tokyo, Japan (35°45'N, 139°32'E) | 31/08/2014    | Adult collection | T.A.      | Male   | Diurnal   | Adult eyes & brain | 01/09/2014 12:00-13:00 | 19,708,896   | DRX229145                | DRR239263         |
| Chy2      | <i>Cephonodes hylas hylas</i> (Linnaeus, 1771)               | Macroglossinae | Higashikurume, Tokyo, Japan (35°45'N, 139°32'E) | 13/09/2015    | Adult collection | T.A.      | Male   | Diurnal   | Adult eyes & brain | 14/09/2015 12:00-13:00 | 27,273,782   | DRX229146                | DRR239264         |
| Chy3      | <i>Cephonodes hylas hylas</i> (Linnaeus, 1771)               | Macroglossinae | Higashikurume, Tokyo, Japan (35°45'N, 139°32'E) | 14/09/2015    | Adult collection | T.A.      | Male   | Diurnal   | Adult eyes & brain | 15/09/2014 12:00-13:00 | 28,864,550   | DRX229147                | DRR239265         |
| Ha1       | <i>Hemaris affinis</i> (Bremer, 1861)                        | Macroglossinae | Hayama, Kanagawa, Japan (35°15'N, 139°36'E)     | 06/08/2014    | Adult collection | T.A.      | Male   | Diurnal   | Adult eyes & brain | 07/08/2014 12:00-13:00 | 31,536,052   | DRX229148                | DRR239266         |
| Ha2       | <i>Hemaris affinis</i> (Bremer, 1861)                        | Macroglossinae | Hayama, Kanagawa, Japan (35°15'N, 139°36'E)     | 02/09/2014    | Adult collection | T.A.      | Male   | Diurnal   | Adult eyes & brain | 03/09/2014 12:00-13:00 | 29,844,236   | DRX229149                | DRR239267         |
| Ha3       | <i>Hemaris affinis</i> (Bremer, 1861)                        | Macroglossinae | Hayama, Kanagawa, Japan (35°15'N, 139°36'E)     | 06/09/2015    | Adult collection | T.A.      | Male   | Diurnal   | Adult eyes & brain | 07/09/2015 12:00-13:00 | 31,834,506   | DRX229150                | DRR239268         |
| Nh1       | <i>Neogurela himachala sangaica</i> (Butler, 1876)           | Macroglossinae | Yokosuka, Kanagawa, Japan (35°15'N, 139°37'E)   | 05/08/2014    | Adult collection | T.A.      | Male   | Diurnal   | Adult eyes & brain | 06/08/2014 12:00-13:00 | 30,722,512   | DRX229151                | DRR239269         |
| Nh2       | <i>Neogurela himachala sangaica</i> (Butler, 1876)           | Macroglossinae | Higashikurume, Tokyo, Japan (35°45'N, 139°32'E) | 31/08/2015    | Adult collection | T.A.      | Female | Diurnal   | Adult eyes & brain | 01/09/2015 12:00-13:00 | 26,655,558   | DRX229152                | DRR239270         |
| Nh3       | <i>Neogurela himachala sangaica</i> (Butler, 1876)           | Macroglossinae | Higashikurume, Tokyo, Japan (35°45'N, 139°32'E) | 14/09/2015    | Adult collection | T.A.      | Female | Diurnal   | Adult eyes & brain | 15/09/2015 12:00-13:00 | 29,837,426   | DRX229153                | DRR239271         |
| Dne1      | <i>Daphnis nerii</i> (Linnaeus, 1758)                        | Macroglossinae | Ishigaki, Okinawa, Japan (24°20'N, 124°10'E)    | 27/09/2014    | Larvae rearing   | T.A.      | Female | Nocturnal | Adult eyes & brain | 14/10/2014 12:00-13:00 | 24,244,384   | DRX229154                | DRR239272         |
| Dne2      | <i>Daphnis nerii</i> (Linnaeus, 1758)                        | Macroglossinae | Ishigaki, Okinawa, Japan (24°20'N, 124°10'E)    | 27/09/2014    | Larvae rearing   | T.A.      | Female | Nocturnal | Adult eyes & brain | 19/10/2014 12:00-13:00 | 23,958,174   | DRX229155                | DRR239273         |
| Dne3      | <i>Daphnis nerii</i> (Linnaeus, 1758)                        | Macroglossinae | Ishigaki, Okinawa, Japan (24°20'N, 124°10'E)    | 27/09/2014    | Larvae rearing   | T.A.      | Female | Nocturnal | Adult eyes & brain | 20/10/2014 12:00-13:00 | 25,434,320   | DRX229156                | DRR239274         |
| Mpy1      | <i>Macroglossum pyrrhosticta</i> Butler, 1875                | Macroglossinae | Hayama, Kanagawa, Japan (35°15'N, 139°36'E)     | 31/08/2015    | Adult collection | T.A.      | Male   | Diurnal   | Adult eyes & brain | 01/09/2015 12:00-13:00 | 30,885,830   | DRX229157                | DRR239275         |
| Mpy2      | <i>Macroglossum pyrrhosticta</i> Butler, 1875                | Macroglossinae | Hayama, Kanagawa, Japan (35°15'N, 139°36'E)     | 01/09/2015    | Adult collection | T.A.      | Male   | Diurnal   | Adult eyes & brain | 02/09/2015 12:00-13:00 | 36,915,156   | DRX229158                | DRR239276         |
| Mbo1      | <i>Macroglossum bombylans</i> Boisduval, 1875                | Macroglossinae | Yokosuka, Kanagawa, Japan (35°15'N, 139°37'E)   | 04/08/2014    | Adult collection | T.A.      | Female | Diurnal   | Adult eyes & brain | 05/08/2014 12:00-13:00 | 22,893,430   | DRX229159                | DRR239277         |
| Mbo2      | <i>Macroglossum bombylans</i> Boisduval, 1875                | Macroglossinae | Hayama, Kanagawa, Japan (35°15'N, 139°36'E)     | 11/09/2015    | Adult collection | T.A.      | Male   | Diurnal   | Adult eyes & brain | 12/09/2015 12:00-13:00 | 25,895,542   | DRX229160                | DRR239278         |
| Mbo3      | <i>Macroglossum bombylans</i> Boisduval, 1875                | Macroglossinae | Hayama, Kanagawa, Japan (35°15'N, 139°36'E)     | 15/09/2015    | Adult collection | T.A.      | Male   | Diurnal   | Adult eyes & brain | 16/09/2015 12:00-13:00 | 27,475,358   | DRX229161                | DRR239279         |
| Aru1      | <i>Ampelophaga rubiginosa rubiginosa</i> Bremer & Grey, 1853 | Macroglossinae | Yokosuka, Kanagawa, Japan (35°15'N, 139°37'E)   | 21/07/2014    | Adult collection | T.A.      | Male   | Nocturnal | Adult eyes & brain | 23/07/2014 12:00-13:00 | 32,037,438   | DRX229162                | DRR239280         |
| Aru2      | <i>Ampelophaga rubiginosa rubiginosa</i> Bremer & Grey, 1853 | Macroglossinae | Yokosuka, Kanagawa, Japan (35°15'N, 139°37'E)   | 21/07/2014    | Adult collection | T.A.      | Male   | Nocturnal | Adult eyes & brain | 23/07/2014 12:00-13:00 | 22,331,642   | DRX229163                | DRR239281         |
| Aru3      | <i>Ampelophaga rubiginosa rubiginosa</i> Bremer & Grey, 1853 | Macroglossinae | Yokosuka, Kanagawa, Japan (35°15'N, 139°37'E)   | 28/07/2014    | Adult collection | T.A.      | Male   | Nocturnal | Adult eyes & brain | 02/08/2014 12:00-13:00 | 24,930,292   | DRX229164                | DRR239282         |
| Tja1      | <i>Theretra japonica</i> (Boisduval, 1869)                   | Macroglossinae | Yokosuka, Kanagawa, Japan (35°14'N, 139°35'E)   | 22/07/2014    | Adult collection | T.A.      | Male   | Nocturnal | Adult eyes & brain | 25/07/2014 12:00-13:00 | 27,381,900   | DRX229165                | DRR239283         |
| Tja2      | <i>Theretra japonica</i> (Boisduval, 1869)                   | Macroglossinae | Yokosuka, Kanagawa, Japan (35°14'N, 139°35'E)   | 22/07/2014    | Adult collection | T.A.      | Female | Nocturnal | Adult eyes & brain | 25/07/2014 12:00-13:00 | 33,482,238   | DRX229166                | DRR239284         |
| Tja3      | <i>Theretra japonica</i> (Boisduval, 1869)                   | Macroglossinae | Yokosuka, Kanagawa, Japan (35°14'N, 139°35'E)   | 25/07/2014    | Adult collection | T.A.      | Male   | Nocturnal | Adult eyes & brain | 29/07/2014 12:00-13:00 | 30,437,216   | DRX229167                | DRR239285         |

Table S2. List of primers for PCR and sequencing

| Gene       | Species                   | Purpose of use   | Primer name      | Length            | Sequences (5' -> 3')  |                           |
|------------|---------------------------|------------------|------------------|-------------------|-----------------------|---------------------------|
| UV         | <i>M. gaschkewitschii</i> | PCR              | External forward | HUV_F01           | 24                    | AATGGGCCAGGAGCACTTCACTG   |
|            |                           | PCR              | External reverse | HUV_R01           | 24                    | TTAGCAGGTGCAGCCATAGTTGTC  |
|            | <i>A. ochracea</i>        | PCR              | External forward | HUV_F02           | 24                    | TCCACAGACAGAAAAGCTTCCC    |
|            |                           | PCR              | External reverse | HUV_R02           | 24                    | CCATTAGAATAGCCATAGTTGTCG  |
|            | <i>C. hylas</i>           | PCR              | External forward | HUV_F03           | 22                    | GACTGCTCACGTATCCTACAAC    |
|            |                           | PCR              | External reverse | HUV_R03           | 25                    | CCATTAAAAAGCCATGGTTGTCGTC |
|            | <i>H. affinis</i>         | PCR              | External forward | HUV_F04           | 22                    | GACTGCTCACGTATCCTACAAC    |
|            |                           | PCR              | External reverse | Same with HUV_R03 |                       |                           |
|            | <i>N. himachala</i>       | PCR              | External forward | HUV_F05           | 21                    | ACTTACTGAGGACTGCTCAC      |
|            |                           | PCR              | External reverse | HUV_R04           | 24                    | GTTTAGAGCGTCGAAGTTGAGTTG  |
|            | <i>D. nerii</i>           | PCR              | External forward | HUV_F06           | 22                    | CACGTAACCTGCAGAACTATCC    |
|            |                           | PCR              | External reverse | HUV_R05           | 21                    | CCATCATTAAGCCGTAGTCCG     |
|            | <i>M. pyrrhosticta</i>    | PCR              | External forward | Same with HUV_F05 |                       |                           |
|            |                           | PCR              | External reverse | HUV_R06           | 22                    | CATCAGTAAAGCGTTGGTTGTC    |
|            | <i>M. bombylans</i>       | PCR              | External forward | Same with HUV_F06 |                       |                           |
|            |                           | PCR              | External reverse | HUV_R07           | 24                    | GTATCGGTTGTCATCAGTATAGC   |
|            | <i>A. rubiginosa</i>      | PCR              | External forward | HUV_F07           | 25                    | CTCACGTAACCTGCAGAACTATCCG |
|            |                           | PCR              | External reverse | HUV_R08           | 24                    | CATCAAAGTCCATCAGTAAAGCC   |
|            | <i>T. japonica</i>        | PCR              | External forward | Same with HUV_F05 |                       |                           |
|            |                           | PCR              | External reverse | Same with HUV_R08 |                       |                           |
|            | All                       | Sequencing       | Internal forward | HUV_seqF01        | 19                    | ATATGTTCTGAGGGCTAC        |
|            |                           | Sequencing       | Internal forward | HUV_seqF02        | 20                    | GAAATAAGAATAGCCAAAGC      |
|            |                           | Sequencing       | Internal reverse | HUV_seqR01        | 18                    | CGCTTCATGGCAAACAC         |
|            |                           | Sequencing       | Internal reverse | HUV_seqR02        | 21                    | AAGCGATGCAAGCGTTAGTCA     |
| Sequencing |                           | Internal reverse | HUV_seqR03       | 21                | AAGCGATGCAAGCGTTAGTCA |                           |
| SW         | <i>M. gaschkewitschii</i> | PCR              | External forward | HSW_F01           | 24                    | CTGTAACAACATAACACCTCCGTCG |
|            |                           | PCR              | External reverse | HSW_R01           | 24                    | GTACTATGGCAACTCATTAAGGCC  |
|            | <i>A. ochracea</i>        | PCR              | External forward | HSW_F02           | 24                    | GCTGTAGCAAATAACTTTCCTTCG  |
|            |                           | PCR              | External reverse | HSW_R02           | 24                    | AAATATCAACCAGAACCAATCCC   |
|            | <i>C. hylas</i>           | PCR              | External forward | HSW_F03           | 25                    | AGCGACTAGTAGTCGGACTACTCAC |
|            |                           | PCR              | External reverse | HSW_R03           | 24                    | GCTTGTGAGACTATGATGATTTCC  |
|            | <i>H. affinis</i>         | PCR              | External forward | HSW_F04           | 23                    | TTAGTCCGACTACTCCTTCGTC    |
|            |                           | PCR              | External reverse | HSW_R04           | 24                    | CGCTTCAAGTCTTTGAATATCCC   |
|            | <i>N. himachala</i>       | PCR              | External forward | HSW_F05           | 24                    | CAAGTGAGAAGCGACTTGTAGTCG  |
|            |                           | PCR              | External reverse | HSW_R05           | 24                    | TATTTCCTAAGAAATCGCGCTCATG |
|            | <i>D. nerii</i>           | PCR              | External forward | Same with HSW_F03 |                       |                           |
|            |                           | PCR              | External reverse | HSW_R06           | 25                    | ACAACATCAAATGTCGCTCTATCTG |
|            | <i>M. pyrrhosticta</i>    | PCR              | External forward | Same with HSW_F04 |                       |                           |
|            |                           | PCR              | External reverse | HSW_R07           | 24                    | AAGTAATTTTGGTATGGTGGGTG   |
|            | <i>M. bombylans</i>       | PCR              | External forward | Same with HSW_F03 |                       |                           |
|            |                           | PCR              | External reverse | HSW_R08           | 24                    | CTTTTGTCTTCATCTCGTTACACG  |
|            | <i>A. rubiginosa</i>      | PCR              | External forward | HSW_F06           | 25                    | TCTGCGACTTGTAGTCGGACTACTC |
|            |                           | PCR              | External reverse | HSW_R09           | 25                    | CTCAAATGACTTTGTAGCTGGTATG |
|            | <i>T. japonica</i>        | PCR              | External forward | Same with HSW_F03 |                       |                           |
|            |                           | PCR              | External reverse | HSW_R10           | 24                    | TGTGGGTAGAAGAAATGATTGG    |
|            | All                       | Sequencing       | Internal forward | HSW_seqF01        | 18                    | GGGTTTCTGACGACGTC         |
|            |                           | Sequencing       | Internal forward | HSW_seqF02        | 19                    | AGCGTTGAGATCAGGATAG       |
|            |                           | Sequencing       | Internal reverse | HSW_seqR01        | 20                    | ATCTTCTTGGCTTGTCTCTTG     |
|            |                           | Sequencing       | Internal reverse | HSW_seqR02        | 19                    | GCCAGTTTATCAGGAACA        |
| Sequencing |                           | Internal reverse | HSW_seqR03       | 19                | GCCAGTTTATCAGGAACA    |                           |
| LW         | <i>M. gaschkewitschii</i> | PCR              | External forward | HLW_F01           | 25                    | GTAATAACCATCTCCAAGCGACTTC |
|            |                           | PCR              | External reverse | HLW_R01           | 24                    | TAATAAAGAACATCGCTTCGGCAC  |
|            | <i>A. ochracea</i>        | PCR              | External forward | HLW_F02           | 23                    | CATCTCCAAGCGATTTCCCTTAC   |
|            |                           | PCR              | External reverse | HLW_R02           | 24                    | TAATAAAGAACATCGCTTCGGCAC  |
|            | <i>C. hylas</i>           | PCR              | External forward | HLW_F03           | 24                    | GTAATAACCATCTCCAAGCGACTTC |
|            |                           | PCR              | External reverse | Same with HLW_R02 |                       |                           |
|            | <i>H. affinis</i>         | PCR              | External forward | Same with HLW_F03 |                       |                           |
|            |                           | PCR              | External reverse | Same with HLW_R02 |                       |                           |
|            | <i>N. himachala</i>       | PCR              | External forward | HLW_F04           | 24                    | CTACAGGAATTTGTGTGATACTCC  |
|            |                           | PCR              | External reverse | HLW_R03           | 24                    | GAACATCGCTTCGGCAAATCGTG   |
|            | <i>D. nerii</i>           | PCR              | External forward | HLW_F05           | 22                    | TCTCCAAGCGACTCCCTTATCC    |
|            |                           | PCR              | External reverse | Same with HLW_R02 |                       |                           |
|            | <i>M. pyrrhosticta</i>    | PCR              | External forward | HLW_F06           | 24                    | CATCTCTAAGCGATCCCTATCCTG  |
|            |                           | PCR              | External reverse | HLW_R04           | 24                    | TAATAAAGATCATCGCTTCGGCAC  |
|            | <i>M. bombylans</i>       | PCR              | External forward | Same with HLW_F06 |                       |                           |
|            |                           | PCR              | External reverse | Same with HLW_R02 |                       |                           |
|            | <i>A. rubiginosa</i>      | PCR              | External forward | Same with HLW_F05 |                       |                           |
|            |                           | PCR              | External reverse | Same with HLW_R02 |                       |                           |
|            | <i>T. japonica</i>        | PCR              | External forward | Same with HLW_F05 |                       |                           |
|            |                           | PCR              | External reverse | Same with HLW_R02 |                       |                           |
|            | All                       | Sequencing       | Internal forward | HLW_seqF01        | 19                    | TGCCGAAGGAAACATGAC        |
|            |                           | Sequencing       | Internal forward | HLW_seqF02        | 21                    | ACCATTTCTTGTGGTTCATG      |
|            |                           | Sequencing       | Internal reverse | HLW_seqR01        | 20                    | TCATTTTCTTAGCCTGTCTCC     |
|            |                           | Sequencing       | Internal reverse | HLW_seqR02        | 20                    | TAACAACCATAGCTGGAGAC      |
| Sequencing |                           | Internal reverse | HLW_seqR03       | 20                | TAACAACCATAGCTGGAGAC  |                           |

**Table S3. Parameters of the absorption spectra of visual and screening pigments in the hawkmoth species**

| Model                                                          | Species                             | Visual pigments         |                                         |                         |                                         |                         |                                         |                                           |                                           |                                           | Screening pigment |                 |          |              |                 |          |
|----------------------------------------------------------------|-------------------------------------|-------------------------|-----------------------------------------|-------------------------|-----------------------------------------|-------------------------|-----------------------------------------|-------------------------------------------|-------------------------------------------|-------------------------------------------|-------------------|-----------------|----------|--------------|-----------------|----------|
|                                                                |                                     | UV $\lambda_{max}$ (nm) | Mean ( $\lambda_{max}$ from Noct.) (nm) | SW $\lambda_{max}$ (nm) | Mean ( $\lambda_{max}$ from Noct.) (nm) | LW $\lambda_{max}$ (nm) | Mean ( $\lambda_{max}$ from Noct.) (nm) | UV amplitude $f_{UV}$ (relative ratio, %) | SW amplitude $f_{SW}$ (relative ratio, %) | LW amplitude $f_{LW}$ (relative ratio, %) | $\mu_1$ (nm)      | $\sigma_1$ (nm) | $\rho_1$ | $\mu_2$ (nm) | $\sigma_2$ (nm) | $\rho_2$ |
| S <sub>d</sub> ( $\lambda$ ) = S( $\lambda$ ) - A( $\lambda$ ) | <i>M. gasciawiewitschi</i> (n = 20) | 353.1                   | 350.6                                   | 448.3                   | 448.4                                   | 534.4                   | 534.9                                   | 0.633 (24.4%)                             | 0.606 (23.3%)                             | 1.358 (52.3%)                             | 459.8             | 154.5           | 0.634    | 652.3        | 63.9            | -0.269   |
|                                                                | <i>T. japonica</i> (n = 19)         | 345.1                   | 344.5                                   | 448.4                   | 439.4                                   | 535.4                   | 513.0                                   | 0.626 (28.2%)                             | 0.434 (19.5%)                             | 1.162 (52.3%)                             | 0.0095            | 543.2           | 0.344    | 688.1        | 63.8            | -0.168   |
|                                                                | <i>C. hylas</i> (n = 18)            | 344.5                   | 346.7 (-3.0)                            | 431.3                   | 439.4 (-9.0)                            | 513.0                   | 520.3 (-14.6)                           | 0.837 (32.5%)                             | 0.575 (22.3%)                             | 1.163 (45.2%)                             | 408.8             | 107.2           | 0.771    | 533.1        | 73.1            | -0.262   |
|                                                                | <i>M. pyrrhosicta</i> (n = 18)      | 348.8                   |                                         | 447.5                   |                                         | 527.5                   |                                         | 0.511 (22.5%)                             | 0.539 (23.8%)                             | 1.218 (53.7%)                             | 390.7             | 125.9           | 0.429    | 653.0        | 34.6            | -0.048   |
